# Supplementary material for: Descriptive Epidemiology of Hospitalization of Patients with a Rare Tumor in an Italian Region
Source: MDPI journal article supplement (doi:10.3390/curroncol29120762), 2022-12-08
Supplement: s1 [file s1]

## **Supplementary Tables and Figures**

**for article**

### **Descriptive epidemiology of hospitalization of patients with a rare tumor in an Italian Region**

Rosa Alessandra<sup>1</sup>, Fontana Vincenzo<sup>1</sup>, Filiberti Rosa Angela<sup>1</sup>, Pronzato Paolo<sup>2</sup>, Mannucci Matilde<sup>1</sup>.

1 - IRCCS Ospedale Policlinico San Martino, Clinical Epidemiology Unit, Genoa, Italy

2 - IRCCS Ospedale Policlinico San Martino, Medical Oncology Unit, Genoa, Italy

#### **Corresponding author:**

Rosa Alessandra, IRCCS Ospedale Policlinico San Martino, Clinical Epidemiology, L.go Rosana Benzi, 10 16132 Genoa, Italy; email: [alessandra.rosa@hsanmartino.it](mailto:alessandra.rosa@hsanmartino.it).

**Supplementary Table S1.** Selection of patients with rare tumors according to ICD-9-CM classification in discharge diagnosis.

| Code | Tumor Groups                           | Site                                                                    | ICD-9-CM*                    |
|------|----------------------------------------|-------------------------------------------------------------------------|------------------------------|
| SAR  | Sarcomas                               | Bone and articular cartilage, connective and soft tissue                | 170-171                      |
| CNS  | Central nervous system                 | Eye, brain, other and unspecified parts of nervous system               | 190-192                      |
| HNT  | Epithelial T of head and neck          | Tongue, major salivary glands, gums, mouth, oro-/naso-pharynx           | 141-147, 149                 |
| HET  | Hematological malignancies             | Multiple myeloma and immunoproliferative neoplasms, leukemias           | 203-208                      |
| TCT  | Epithelial T of thoracic cavity        | Trachea, pleural mesothelioma, thymus                                   | 162.1, 163, 164.0            |
| GUT  | Urinary system and male genital organs | Testis, penis, other male genital organs; renal pelvis, ureter, urethra | 186-187, 189.1, 189.2, 189.3 |
| FGT  | Female genital system                  | Vagina, clitoris and vulva                                              | 184.0, 184.3, 184.4          |
| DGT  | Epithelial T of digestive system       | Small intestine, anus, liver, gallbladder, bile ducts                   | 152, 154.3, 155-156          |
| EGT  | T of endocrine glands                  | Including thyroid                                                       | 193-194                      |
| SKT  | Epithelial T of skin                   | Skin of trunk except scrotum; labia                                     | 173.5, 184.1, 184.2          |

\* International Classification of Disease, Nine Revision, Clinical Modification

**Supplementary Table S2.** Distribution of age at H<sub>0</sub> by group of rare tumors.

| Tumor Groups                 | Age at H <sub>0</sub> <sup>a</sup> |                |                |                |                |
|------------------------------|------------------------------------|----------------|----------------|----------------|----------------|
|                              | 0-20                               |                | 21-103         |                | Total          |
|                              | N <sup>§</sup>                     | % <sup>*</sup> | N <sup>§</sup> | % <sup>*</sup> | N <sup>§</sup> |
| Sarcomas (SAR)               | 331                                | 11.29          | 2601           | 88.71          | 2932           |
| Central nervous system (CNS) | 889                                | 11.41          | 6900           | 88.59          | 7789           |
| Head and neck (HNT)          | 21                                 | 0.47           | 4461           | 99.53          | 4482           |
| Hematological (HET)          | 692                                | 5.43           | 12055          | 94.57          | 12747          |
| Thoracic cavity (TCT)        | 0                                  | 0.00           | 3458           | 100.00         | 3458           |
| Genitourinary system (GUT)   | 49                                 | 1.32           | 3664           | 98.68          | 3713           |
| Female genital system (FGT)  | 0                                  | 0.00           | 967            | 100.00         | 967            |
| Digestive system (DGT)       | 23                                 | 0.20           | 11687          | 99.80          | 11710          |
| Endocrine glands (EGT)       | 422                                | 8.05           | 4820           | 91.95          | 5242           |
| Skin (SKT)                   | 9                                  | 0.21           | 4280           | 99.79          | 4289           |
| Total                        | 2436                               | 4.25           | 54893          | 95.75          | 57329          |

<sup>a</sup> index hospitalization (first admission); <sup>§</sup> total admission; <sup>\*</sup> calculated on the total at the previous admission

**Supplementary Table S3.** Distribution of re-hospitalization by group of rare tumors and calendar period.**Sarcomas (SAR)**

| Period    |                             | Re-hospitalization |                |                |                |                |                |                |                |                |                |                |                |                |                |
|-----------|-----------------------------|--------------------|----------------|----------------|----------------|----------------|----------------|----------------|----------------|----------------|----------------|----------------|----------------|----------------|----------------|
|           | H <sub>0</sub> <sup>a</sup> | First              |                | Second         |                | Third          |                | Fourth         |                | Fifth          |                | Tenth          |                | Fifteenth      |                |
|           | N <sup>§</sup>              | N <sup>§</sup>     | % <sup>*</sup> | N <sup>§</sup> | % <sup>*</sup> | N <sup>§</sup> | % <sup>*</sup> | N <sup>§</sup> | % <sup>*</sup> | N <sup>§</sup> | % <sup>*</sup> | N <sup>§</sup> | % <sup>*</sup> | N <sup>§</sup> | % <sup>*</sup> |
| 2000-2004 | 972                         | 520                | 53             | 344            | 66             | 275            | 80             | 219            | 80             | 184            | 84             | 97             | 88             | 54             | 87             |
| 2005-2009 | 709                         | 366                | 52             | 243            | 66             | 182            | 75             | 153            | 84             | 131            | 86             | 71             | 90             | 39             | 93             |
| 2010-2014 | 625                         | 291                | 47             | 196            | 67             | 159            | 81             | 121            | 76             | 96             | 79             | 50             | 93             | 31             | 97             |
| 2015-2019 | 626                         | 280                | 45             | 180            | 64             | 138            | 77             | 112            | 81             | 87             | 78             | 48             | 84             | 19             | 79             |
| Total     | 2932                        | 1457               | 50             | 963            | 66             | 754            | 78             | 605            | 80             | 498            | 82             | 266            | 89             | 143            | 89             |

**Central Nervous System (CNS)**

| Period    |                             | Re-hospitalization |                |                |                |                |                |                |                |                |                |                |                |                |                |
|-----------|-----------------------------|--------------------|----------------|----------------|----------------|----------------|----------------|----------------|----------------|----------------|----------------|----------------|----------------|----------------|----------------|
|           | H <sub>0</sub> <sup>a</sup> | First              |                | Second         |                | Third          |                | Fourth         |                | Fifth          |                | Tenth          |                | Fifteenth      |                |
|           | N <sup>§</sup>              | N <sup>§</sup>     | % <sup>*</sup> | N <sup>§</sup> | % <sup>*</sup> | N <sup>§</sup> | % <sup>*</sup> | N <sup>§</sup> | % <sup>*</sup> | N <sup>§</sup> | % <sup>*</sup> | N <sup>§</sup> | % <sup>*</sup> | N <sup>§</sup> | % <sup>*</sup> |
| 2000-2004 | 2111                        | 1142               | 54             | 740            | 65             | 517            | 70             | 383            | 74             | 311            | 81             | 134            | 86             | 75             | 88             |
| 2005-2009 | 1932                        | 991                | 51             | 627            | 63             | 433            | 69             | 329            | 76             | 253            | 77             | 91             | 83             | 57             | 86             |
| 2010-2014 | 1949                        | 949                | 49             | 610            | 64             | 437            | 72             | 302            | 69             | 223            | 74             | 90             | 88             | 49             | 84             |
| 2015-2019 | 1797                        | 852                | 47             | 456            | 54             | 269            | 59             | 168            | 62             | 109            | 65             | 34             | 77             | 14             | 100            |
| Total     | 7789                        | 3934               | 51             | 2433           | 62             | 1656           | 68             | 1182           | 71             | 896            | 76             | 349            | 85             | 195            | 87             |

**Head and neck (HNT)**

| Period    |                             | Re-hospitalization |                |                |                |                |                |                |                |                |                |                |                |                |                |
|-----------|-----------------------------|--------------------|----------------|----------------|----------------|----------------|----------------|----------------|----------------|----------------|----------------|----------------|----------------|----------------|----------------|
|           | H <sub>0</sub> <sup>a</sup> | First              |                | Second         |                | Third          |                | Fourth         |                | Fifth          |                | Tenth          |                | Fifteenth      |                |
|           | N <sup>§</sup>              | N <sup>§</sup>     | % <sup>*</sup> | N <sup>§</sup> | % <sup>*</sup> | N <sup>§</sup> | % <sup>*</sup> | N <sup>§</sup> | % <sup>*</sup> | N <sup>§</sup> | % <sup>*</sup> | N <sup>§</sup> | % <sup>*</sup> | N <sup>§</sup> | % <sup>*</sup> |
| 2000-2004 | 1519                        | 977                | 64             | 635            | 65             | 442            | 70             | 312            | 71             | 207            | 66             | 40             | 75             | 3              | 50             |
| 2005-2009 | 1169                        | 783                | 67             | 505            | 64             | 338            | 67             | 237            | 70             | 145            | 61             | 17             | 55             | 4              | 100            |
| 2010-2014 | 941                         | 586                | 62             | 334            | 57             | 198            | 59             | 116            | 59             | 68             | 59             | 8              | 100            | 2              | 67             |
| 2015-2019 | 853                         | 401                | 47             | 196            | 49             | 116            | 59             | 60             | 52             | 35             | 58             | 3              | 75             | 1              | 100            |
| Total     | 4482                        | 2747               | 61             | 1670           | 61             | 1094           | 66             | 725            | 66             | 455            | 63             | 68             | 71             | 10             | 71             |

**Supplementary Table S3.** (continued)

| Hematological (HET)        |                             |                    |                |        |                |       |                |        |                |       |                |       |                |           |                |
|----------------------------|-----------------------------|--------------------|----------------|--------|----------------|-------|----------------|--------|----------------|-------|----------------|-------|----------------|-----------|----------------|
| Period                     |                             | Re-hospitalization |                |        |                |       |                |        |                |       |                |       |                |           |                |
|                            | H <sub>0</sub> <sup>a</sup> | First              |                | Second |                | Third |                | Fourth |                | Fifth |                | Tenth |                | Fifteenth |                |
|                            | N\$                         | N\$                | % <sup>*</sup> | N\$    | % <sup>*</sup> | N\$   | % <sup>*</sup> | N\$    | % <sup>*</sup> | N\$   | % <sup>*</sup> | N\$   | % <sup>*</sup> | N\$       | % <sup>*</sup> |
| 2000-2004                  | 4391                        | 3341               | 76             | 2644   | 79             | 2137  | 81             | 1751   | 82             | 1467  | 84             | 691   | 88             | 341       | 87             |
| 2005-2009                  | 3407                        | 2418               | 71             | 1900   | 79             | 1558  | 82             | 1297   | 83             | 1094  | 84             | 527   | 88             | 226       | 82             |
| 2010-2014                  | 2664                        | 1986               | 75             | 1532   | 77             | 1242  | 81             | 1009   | 81             | 841   | 83             | 331   | 84             | 121       | 79             |
| 2015-2019                  | 2280                        | 1534               | 67             | 1136   | 74             | 857   | 75             | 689    | 80             | 520   | 75             | 171   | 81             | 70        | 80             |
| Total                      | 12742                       | 9279               | 73             | 7212   | 78             | 5794  | 80             | 4746   | 82             | 3922  | 83             | 1720  | 86             | 758       | 83             |
| Thoracic cavity (TCT)      |                             |                    |                |        |                |       |                |        |                |       |                |       |                |           |                |
|                            |                             | Re-hospitalization |                |        |                |       |                |        |                |       |                |       |                |           |                |
| Period                     | H <sub>0</sub>              | First              |                | Second |                | Third |                | Fourth |                | Fifth |                | Tenth |                | Fifteenth |                |
|                            | N\$                         | N\$                | % <sup>*</sup> | N\$    | % <sup>*</sup> | N\$   | % <sup>*</sup> | N\$    | % <sup>*</sup> | N\$   | % <sup>*</sup> | N\$   | % <sup>*</sup> | N\$       | % <sup>*</sup> |
| 2000-2004                  | 973                         | 666                | 68             | 489    | 73             | 353   | 72             | 276    | 78             | 212   | 77             | 42    | 75             | 8         | 62             |
| 2005-2009                  | 930                         | 658                | 71             | 487    | 74             | 354   | 73             | 247    | 70             | 170   | 69             | 27    | 75             | 6         | 75             |
| 2010-2014                  | 852                         | 581                | 68             | 412    | 71             | 287   | 70             | 195    | 68             | 126   | 65             | 7     | 35             | 1         | 100            |
| 2015-2019                  | 702                         | 441                | 63             | 257    | 58             | 146   | 57             | 89     | 61             | 41    | 46             | 2     | 100            | 0         | 0              |
| Total                      | 3457                        | 2346               | 68             | 1645   | 70             | 1140  | 69             | 807    | 71             | 549   | 68             | 78    | 68             | 15        | 68             |
| Genitourinary system (GUT) |                             |                    |                |        |                |       |                |        |                |       |                |       |                |           |                |
| Period                     |                             | Re-hospitalization |                |        |                |       |                |        |                |       |                |       |                |           |                |
|                            | H <sub>0</sub> <sup>a</sup> | First              |                | Second |                | Third |                | Fourth |                | Fifth |                | Tenth |                | Fifteenth |                |
|                            | N\$                         | N\$                | % <sup>*</sup> | N\$    | % <sup>*</sup> | N\$   | % <sup>*</sup> | N\$    | % <sup>*</sup> | N\$   | % <sup>*</sup> | N\$   | % <sup>*</sup> | N\$       | % <sup>*</sup> |
| 2000-2004                  | 920                         | 438                | 48             | 217    | 50             | 110   | 51             | 73     | 66             | 52    | 71             | 12    | 75             | 3         | 75             |
| 2005-2009                  | 897                         | 382                | 43             | 173    | 45             | 85    | 49             | 52     | 61             | 32    | 62             | 6     | 100            | 0         | 0              |
| 2010-2014                  | 924                         | 416                | 45             | 155    | 37             | 72    | 46             | 45     | 63             | 31    | 69             | 5     | 100            | 0         | 0              |
| 2015-2019                  | 972                         | 389                | 40             | 142    | 37             | 72    | 51             | 38     | 53             | 22    | 58             | 2     | 40             | 0         | 0              |
| Total                      | 3713                        | 1625               | 44             | 687    | 42             | 339   | 49             | 208    | 61             | 137   | 66             | 25    | 78             | 3         | 60             |

**Supplementary Table S3.** (continued)

## Female genital system (FGT)

| Period    |                             | Re-hospitalization |                |                |                |                |                |                |                |                |                |                |                |                |                |
|-----------|-----------------------------|--------------------|----------------|----------------|----------------|----------------|----------------|----------------|----------------|----------------|----------------|----------------|----------------|----------------|----------------|
|           | H <sub>0</sub> <sup>a</sup> | First              |                | Second         |                | Third          |                | Fourth         |                | Fifth          |                | Tenth          |                | Fifteenth      |                |
|           | N <sup>§</sup>              | N <sup>§</sup>     | % <sup>*</sup> | N <sup>§</sup> | % <sup>*</sup> | N <sup>§</sup> | % <sup>*</sup> | N <sup>§</sup> | % <sup>*</sup> | N <sup>§</sup> | % <sup>*</sup> | N <sup>§</sup> | % <sup>*</sup> | N <sup>§</sup> | % <sup>*</sup> |
| 2000-2004 | 285                         | 164                | 58             | 88             | 54             | 55             | 63             | 38             | 69             | 24             | 63             | 1              | 50             | 1              | 100            |
| 2005-2009 | 249                         | 136                | 55             | 71             | 52             | 39             | 55             | 23             | 59             | 14             | 61             | 2              | 100            | 0              | 0              |
| 2010-2014 | 215                         | 112                | 52             | 66             | 59             | 42             | 64             | 20             | 48             | 13             | 65             | 0              | 0              | 0              | 0              |
| 2015-2019 | 218                         | 81                 | 37             | 40             | 49             | 18             | 45             | 11             | 61             | 4              | 36             | 0              | 0              | 0              | 0              |
| Total     | 967                         | 493                | 51             | 265            | 54             | 154            | 58             | 92             | 60             | 55             | 60             | 3              | 60             | 1              | 100            |

## Digestive system (DGT)

| Period    |                             | Re-hospitalization |                |                |                |                |                |                |                |                |                |                |                |                |                |
|-----------|-----------------------------|--------------------|----------------|----------------|----------------|----------------|----------------|----------------|----------------|----------------|----------------|----------------|----------------|----------------|----------------|
|           | H <sub>0</sub> <sup>a</sup> | First              |                | Second         |                | Third          |                | Fourth         |                | Fifth          |                | Tenth          |                | Fifteenth      |                |
|           | N <sup>§</sup>              | N <sup>§</sup>     | % <sup>*</sup> | N <sup>§</sup> | % <sup>*</sup> | N <sup>§</sup> | % <sup>*</sup> | N <sup>§</sup> | % <sup>*</sup> | N <sup>§</sup> | % <sup>*</sup> | N <sup>§</sup> | % <sup>*</sup> | N <sup>§</sup> | % <sup>*</sup> |
| 2000-2004 | 3457                        | 2115               | 61             | 1405           | 66             | 1006           | 72             | 766            | 76             | 576            | 75             | 163            | 77             | 54             | 76             |
| 2005-2009 | 3016                        | 1869               | 62             | 1293           | 69             | 935            | 72             | 681            | 73             | 505            | 74             | 149            | 82             | 37             | 76             |
| 2010-2014 | 2671                        | 1615               | 60             | 1024           | 63             | 702            | 69             | 496            | 71             | 334            | 67             | 48             | 67             | 8              | 53             |
| 2015-2019 | 2560                        | 1318               | 51             | 748            | 57             | 421            | 56             | 255            | 61             | 147            | 58             | 15             | 71             | 4              | 100            |
| Total     | 11704                       | 6917               | 59             | 4470           | 65             | 3064           | 69             | 2198           | 72             | 1562           | 71             | 375            | 77             | 103            | 74             |

## Endocrine glands (EGT)

| Period    |                             | Re-hospitalization |                |                |                |                |                |                |                |                |                |                |                |                |                |
|-----------|-----------------------------|--------------------|----------------|----------------|----------------|----------------|----------------|----------------|----------------|----------------|----------------|----------------|----------------|----------------|----------------|
|           | H <sub>0</sub> <sup>a</sup> | First              |                | Second         |                | Third          |                | Fourth         |                | Fifth          |                | Tenth          |                | Fifteenth      |                |
|           | N <sup>§</sup>              | N <sup>§</sup>     | % <sup>*</sup> | N <sup>§</sup> | % <sup>*</sup> | N <sup>§</sup> | % <sup>*</sup> | N <sup>§</sup> | % <sup>*</sup> | N <sup>§</sup> | % <sup>*</sup> | N <sup>§</sup> | % <sup>*</sup> | N <sup>§</sup> | % <sup>*</sup> |
| 2000-2004 | 1534                        | 943                | 61             | 561            | 59             | 339            | 60             | 240            | 71             | 186            | 78             | 58             | 78             | 15             | 79             |
| 2005-2009 | 1333                        | 687                | 52             | 361            | 53             | 214            | 59             | 137            | 64             | 102            | 74             | 26             | 76             | 10             | 91             |
| 2010-2014 | 1209                        | 481                | 40             | 218            | 45             | 116            | 53             | 83             | 72             | 63             | 76             | 19             | 68             | 7              | 78             |
| 2015-2019 | 1166                        | 296                | 25             | 107            | 36             | 59             | 55             | 42             | 71             | 31             | 74             | 5              | 56             | 1              | 100            |
| Total     | 5242                        | 2407               | 46             | 1247           | 52             | 728            | 58             | 502            | 69             | 382            | 76             | 108            | 74             | 33             | 83             |

**Supplementary Table S3.** (continued)

Skin (SKT)

| Period    |                             | Re-hospitalization |                |                |                |                |                |                |                |                |                |                |                |                |                |
|-----------|-----------------------------|--------------------|----------------|----------------|----------------|----------------|----------------|----------------|----------------|----------------|----------------|----------------|----------------|----------------|----------------|
|           | H <sub>0</sub> <sup>a</sup> | First              |                | Second         |                | Third          |                | Fourth         |                | Fifth          |                | Tenth          |                | Fifteenth      |                |
|           | N <sup>§</sup>              | N <sup>§</sup>     | % <sup>*</sup> | N <sup>§</sup> | % <sup>*</sup> | N <sup>§</sup> | % <sup>*</sup> | N <sup>§</sup> | % <sup>*</sup> | N <sup>§</sup> | % <sup>*</sup> | N <sup>§</sup> | % <sup>*</sup> | N <sup>§</sup> | % <sup>*</sup> |
| 2000-2004 | 1274                        | 289                | 23             | 114            | 39             | 58             | 51             | 36             | 62             | 25             | 69             | 8              | 89             | 1              | 50             |
| 2005-2009 | 1276                        | 239                | 19             | 87             | 36             | 42             | 48             | 29             | 69             | 17             | 59             | 4              | 80             | 1              | 100            |
| 2010-2014 | 865                         | 126                | 15             | 41             | 33             | 23             | 56             | 10             | 43             | 7              | 70             | 0              | 0              | 0              | 0              |
| 2015-2019 | 873                         | 93                 | 11             | 30             | 32             | 15             | 50             | 6              | 40             | 3              | 50             | 0              | 0              | 0              | 0              |
| Total     | 4288                        | 747                | 17             | 272            | 36             | 138            | 51             | 81             | 59             | 52             | 64             | 12             | 86             | 2              | 67             |

<sup>a</sup> index hospitalization (first admission); <sup>§</sup> total admission; <sup>\*</sup> calculated on the total at the previous admission

**Supplementary Figure S1.** Median timespan and 95% confidence interval between two consecutive hospitalizations for rare tumor in Sarcomas in Liguria Region, 2000-2019

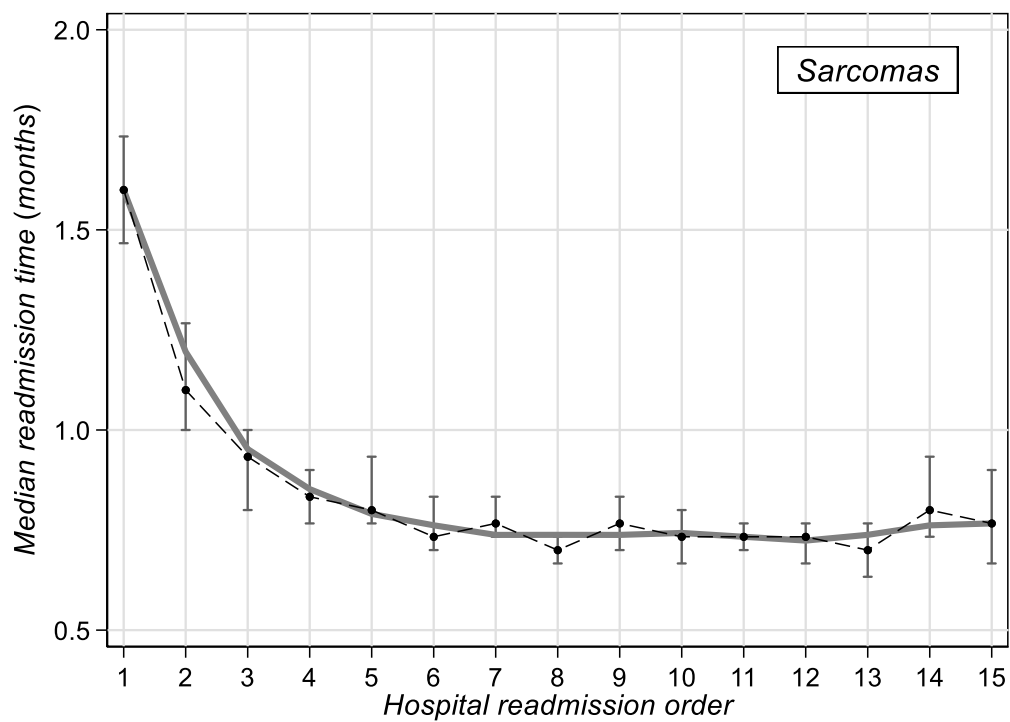

**Supplementary Figure S2.** Median timespan and 95% confidence interval between two consecutive hospitalizations for rare tumor in central nervous system tumor in Liguria Region, 2000-2019

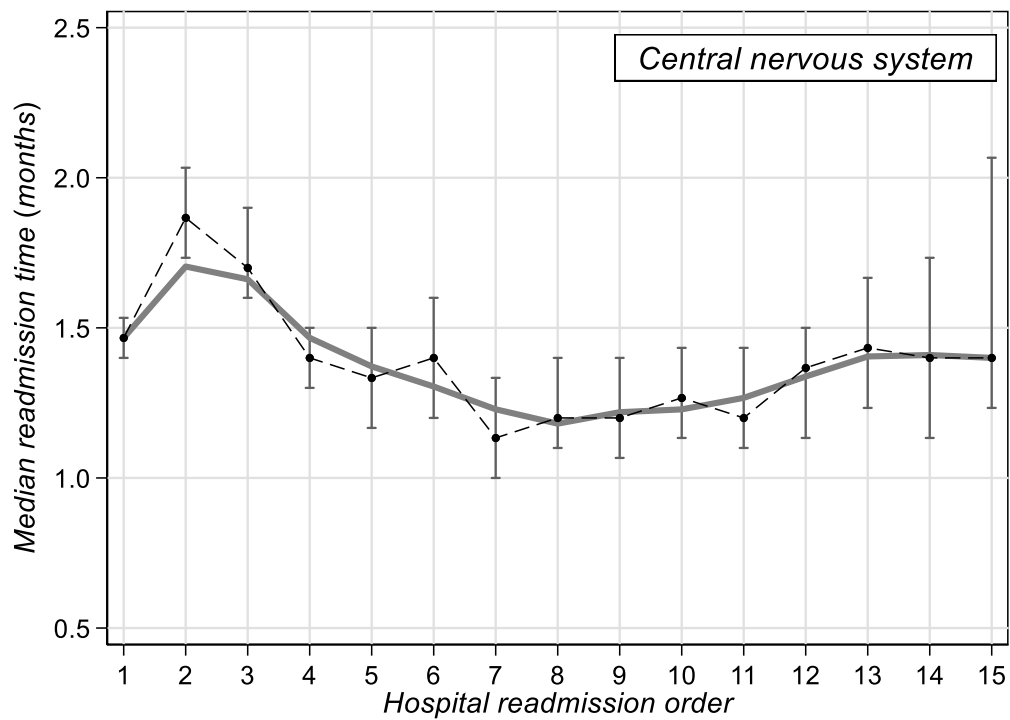



**Supplementary Figure S3.** Median timespan and 95% confidence interval between two consecutive hospitalizations for rare tumor in Head and neck tumor system in Liguria Region, 2000-2019

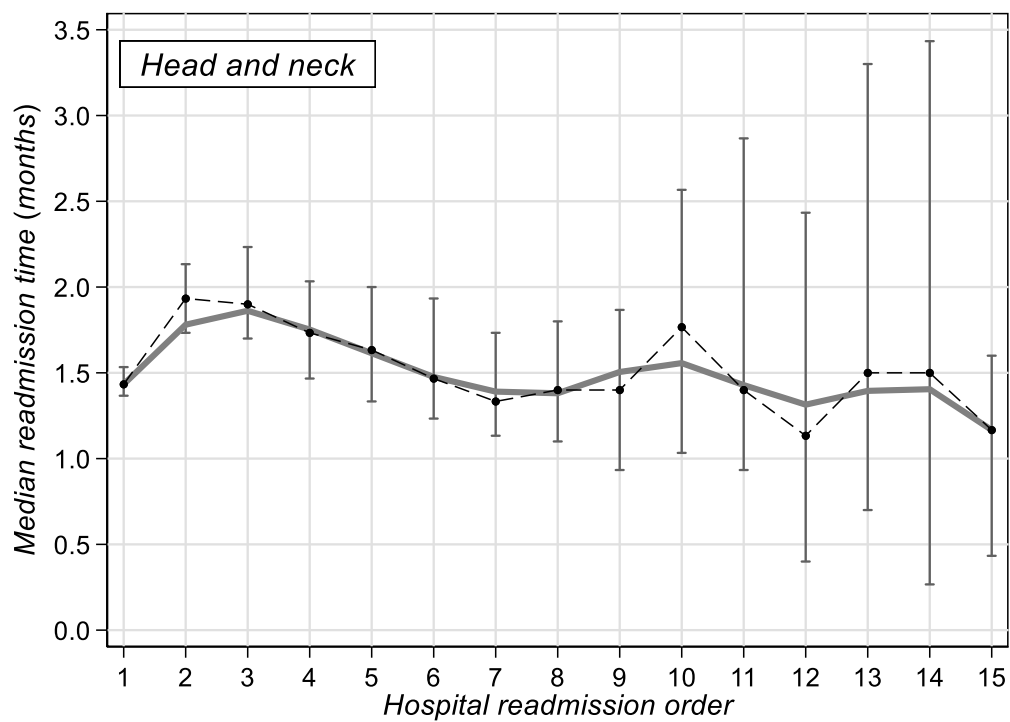

**Supplementary Figure S4.** Median timespan and 95% confidence interval between two consecutive hospitalizations for rare tumor in hematological tumor in Liguria Region, 2000-2019

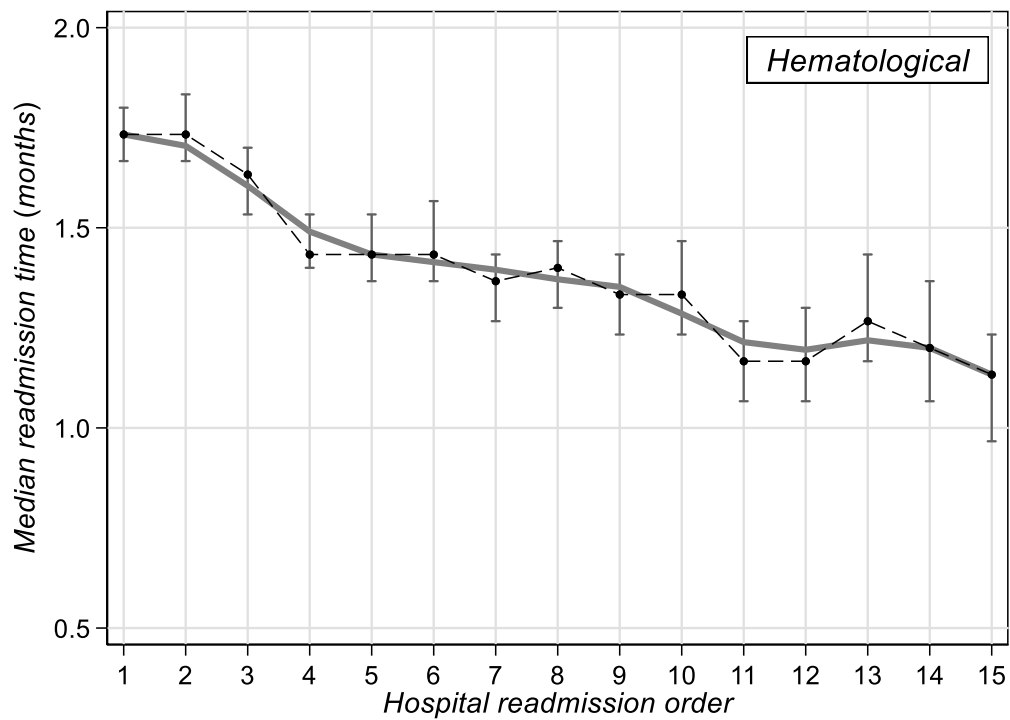

**Supplementary Figure S5.** Median timespan and 95% confidence interval between two consecutive hospitalizations for rare tumor in thoracic cavity tumor in Liguria Region, 2000-2019

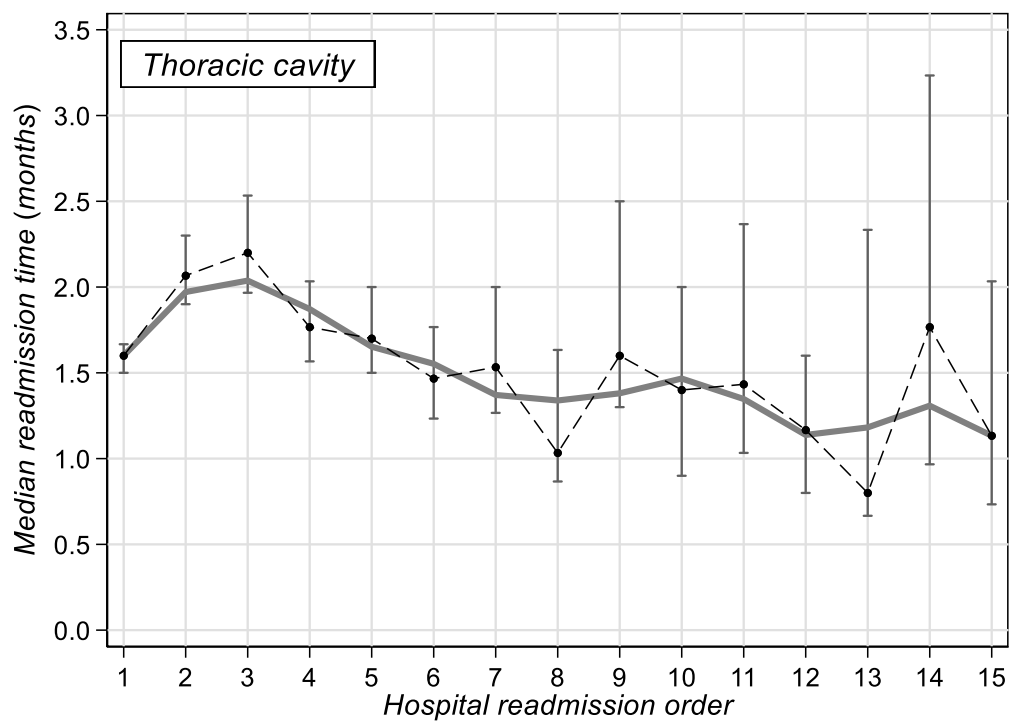

**Supplementary Figure S6.** Median timespan and 95% confidence interval between two consecutive hospitalizations for rare tumor in genitourinary system tumor in Liguria Region, 2000-2019

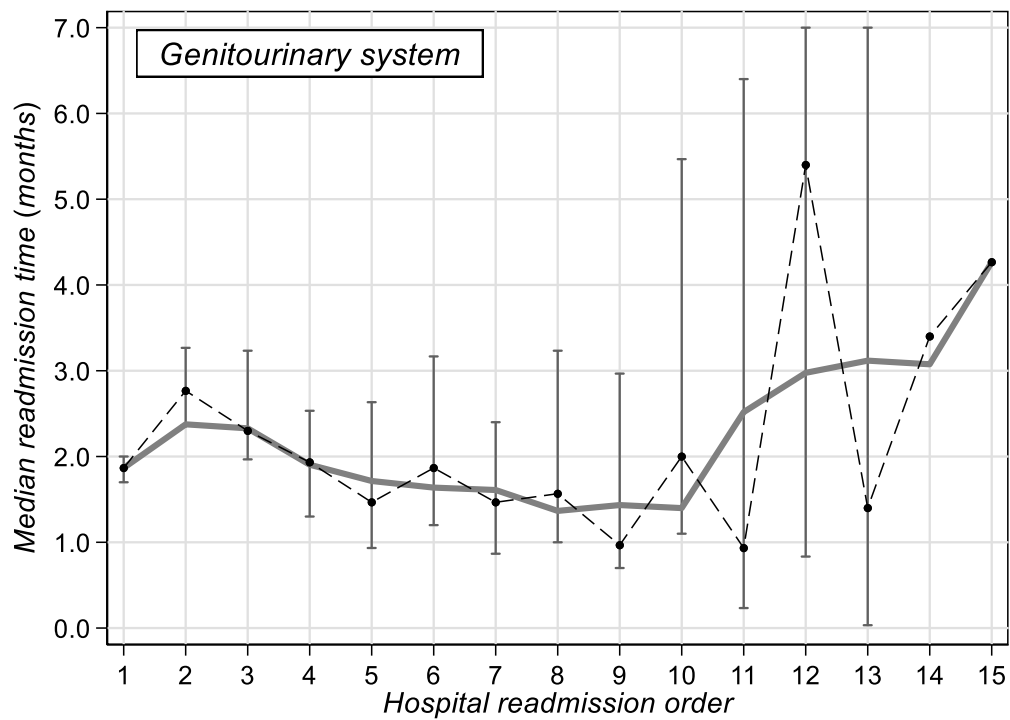

**Supplementary Figure S7.** Median timespan and 95% confidence interval between two consecutive hospitalizations for rare tumor in female genital system tumor in Liguria Region, 2000-2019

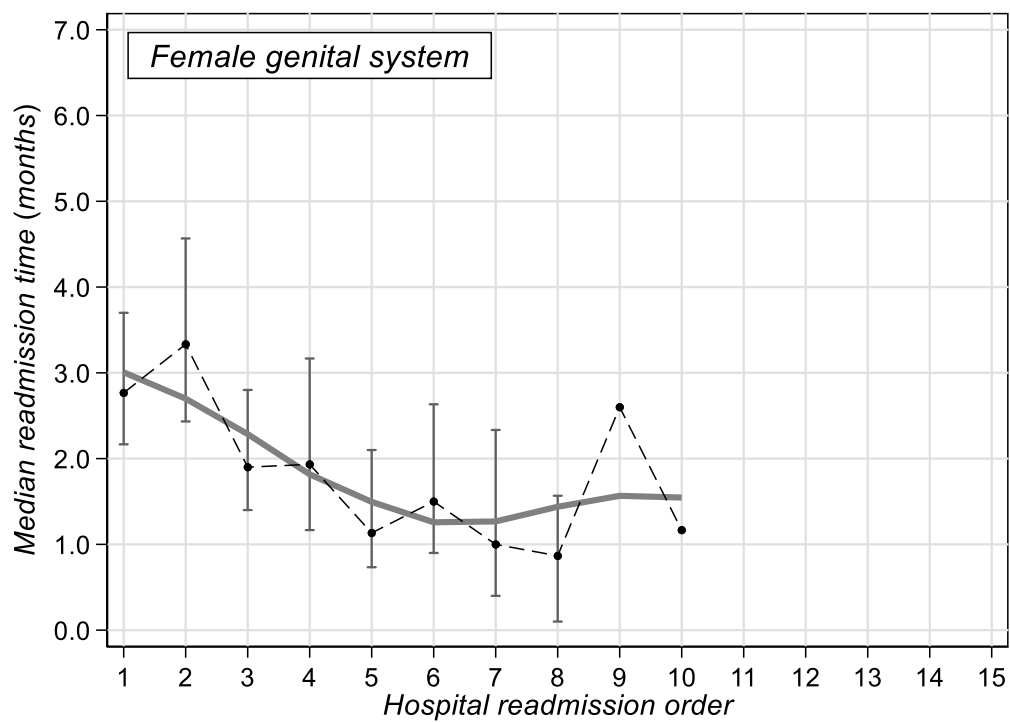

**Supplementary Figure S8.** Median timespan and 95% confidence interval between two consecutive hospitalizations for rare tumor in digestive system tumor in Liguria Region, 2000-2019

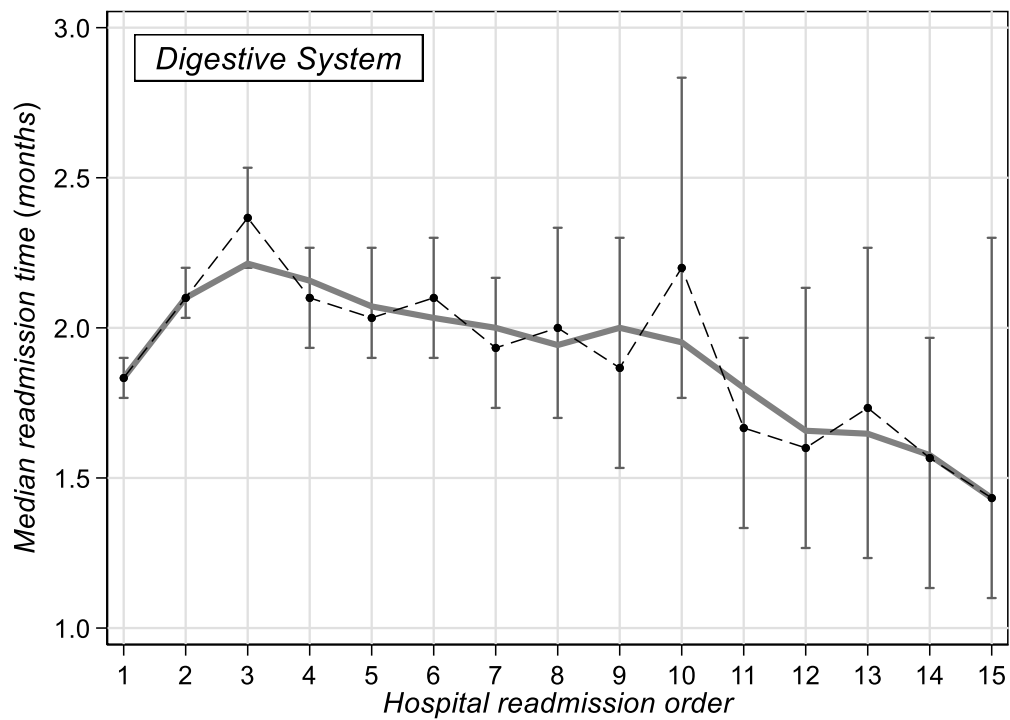

**Supplementary Figure S9.** Median timespan and 95% confidence interval between two consecutive hospitalizations for rare tumor in endocrine glands tumor in Liguria Region, 2000-2019

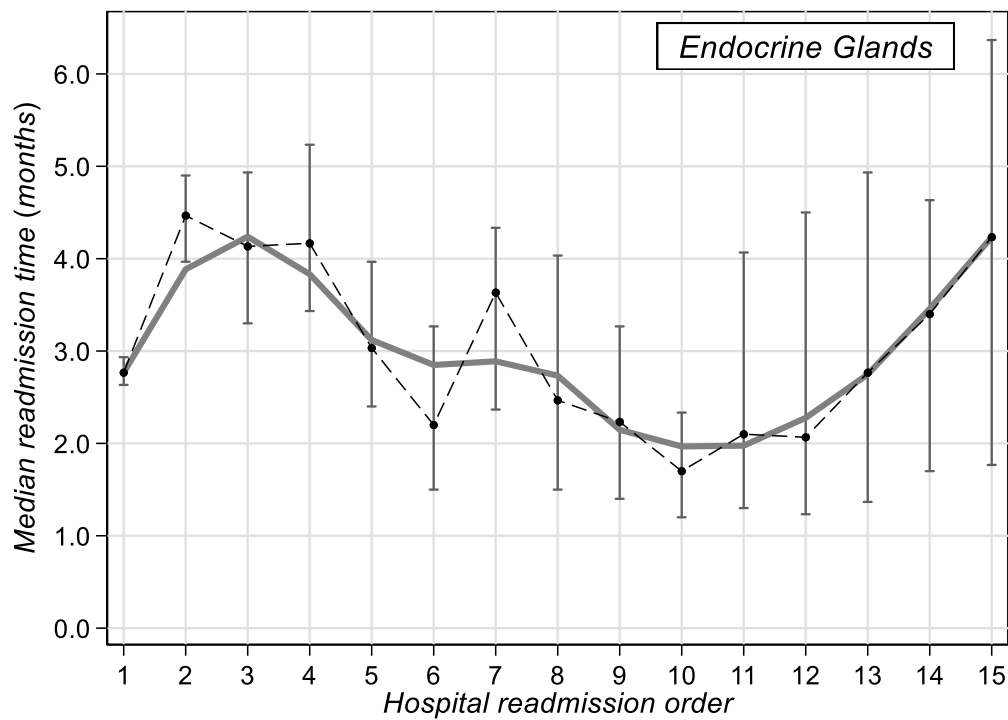

**Supplementary Figure S10.** Median timespan and 95% confidence interval between two consecutive hospitalizations for rare tumor in skin tumor in Liguria Region, 2000-2019

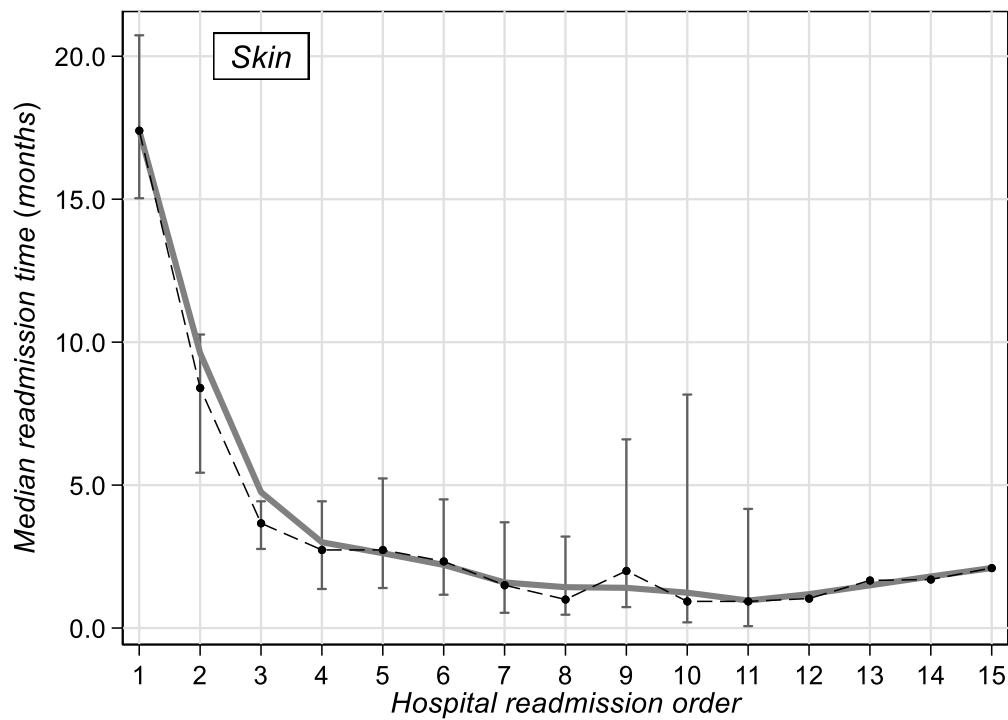

**Supplementary Table S4.** Type of hospitalization of patients with rare tumors in Liguria Region during 2000-2019.

| Type of hospitalization       | Hospitalizations at H <sub>0</sub> <sup>a</sup> |                | All hospitalizations |                |
|-------------------------------|-------------------------------------------------|----------------|----------------------|----------------|
|                               | N <sup>§</sup>                                  | % <sup>*</sup> | N <sup>§</sup>       | % <sup>*</sup> |
| Planned – No Emergency        | 19430                                           | 33.9           | 66492                | 36.2           |
| Emergency                     | 18062                                           | 31.5           | 47185                | 25.7           |
| Mandatory Medical Treatment   | 6                                               | 0.1            | 19                   | 0.1            |
| Planned – pre-hospitalization | 2205                                            | 3.9            | 3963                 | 2.2            |
| Missing data                  | 17626                                           | 30.8           | 66300                | 36.0           |
| Total                         | 57329                                           | 100.0          | 183959               | 100.0          |

<sup>a</sup> index hospitalization (first admission); <sup>§</sup> absolute frequency; <sup>\*</sup> percent frequency.

**Supplementary Table S5.** Regimen of hospitalization of patients with rare tumors in Liguria Region during 2000-2019.

| Regimen of hospitalization | Hospitalizations at H <sub>0</sub> <sup>a</sup> |                | All hospitalizations |                |
|----------------------------|-------------------------------------------------|----------------|----------------------|----------------|
|                            | N <sup>§</sup>                                  | % <sup>*</sup> | N <sup>§</sup>       | % <sup>*</sup> |
| Ordinary                   | 38879                                           | 67.8           | 115316               | 62.7           |
| Day Hospital               | 18192                                           | 31.7           | 67817                | 36.9           |
| Missing data               | 258                                             | 0.4            | 826                  | 0.5            |
| Total                      | 57329                                           | 100.0          | 183959               | 100.0          |

<sup>a</sup> index hospitalization (first admission); <sup>§</sup> absolute frequency; <sup>\*</sup> percent frequency

**Supplementary Table S6.** Hospitalization regimen in patients with rare tumors in Liguria Region during 2000-2019 by calendar period and re-hospitalization order.

| Hospitalization             | Period    | Ordinary       |                | Day Hospital   |                | Missing data   |                | Total |
|-----------------------------|-----------|----------------|----------------|----------------|----------------|----------------|----------------|-------|
|                             |           | N <sup>§</sup> | % <sup>*</sup> | N <sup>§</sup> | % <sup>*</sup> | N <sup>§</sup> | % <sup>*</sup> |       |
| H <sub>0</sub> <sup>a</sup> | 2000-2004 | 11342          | 65             | 6094           | 35             | 0              | 0              | 17436 |
|                             | 2005-2009 | 9659           | 65             | 5259           | 35             | 0              | 0              | 14918 |
|                             | 2010-2014 | 8596           | 67             | 4061           | 31             | 258            | 2              | 12915 |
|                             | 2015-2019 | 9274           | 77             | 2773           | 23             | 0              | 0              | 12047 |
|                             | Total     | 38871          | 68             | 18187          | 32             | 258            | 0              | 57316 |
| First                       | 2000-2004 | 6904           | 65             | 3687           | 35             | 4              | 0              | 10595 |
|                             | 2005-2009 | 5529           | 65             | 2997           | 35             | 3              | 0              | 8529  |
|                             | 2010-2014 | 4678           | 65             | 2303           | 32             | 162            | 2              | 7143  |
|                             | 2015-2019 | 3822           | 67             | 1863           | 33             | 0              | 0              | 5685  |
|                             | Total     | 20933          | 66             | 10850          | 34             | 169            | 1              | 31952 |
| Second                      | 2000-2004 | 4450           | 61             | 2784           | 38             | 3              | 0              | 7237  |
|                             | 2005-2009 | 3483           | 61             | 2259           | 39             | 5              | 0              | 5747  |
|                             | 2010-2014 | 2777           | 61             | 1729           | 38             | 82             | 2              | 4588  |
|                             | 2015-2019 | 2115           | 64             | 1177           | 36             | 0              | 0              | 3292  |
|                             | Total     | 12825          | 61             | 7949           | 38             | 90             | 0              | 20864 |
| Third                       | 2000-2004 | 3195           | 60             | 2093           | 40             | 4              | 0              | 5292  |
|                             | 2005-2009 | 2495           | 60             | 1678           | 40             | 7              | 0              | 4180  |
|                             | 2010-2014 | 1996           | 61             | 1224           | 37             | 58             | 2              | 3278  |
|                             | 2015-2019 | 1382           | 65             | 729            | 35             | 0              | 0              | 2111  |
|                             | Total     | 9068           | 61             | 5724           | 39             | 69             | 0              | 14861 |
| Fourth                      | 2000-2004 | 2462           | 60             | 1632           | 40             | 0              | 0              | 4094  |
|                             | 2005-2009 | 1929           | 61             | 1251           | 39             | 5              | 0              | 3185  |
|                             | 2010-2014 | 1431           | 60             | 925            | 39             | 41             | 2              | 2397  |
|                             | 2015-2019 | 962            | 65             | 508            | 35             | 0              | 0              | 1470  |
|                             | Total     | 6784           | 61             | 4316           | 39             | 46             | 0              | 11146 |
| Fifth                       | 2000-2004 | 1919           | 59             | 1323           | 41             | 2              | 0              | 3244  |
|                             | 2005-2009 | 1401           | 57             | 1057           | 43             | 5              | 0              | 2463  |
|                             | 2010-2014 | 1062           | 59             | 707            | 39             | 33             | 2              | 1802  |
|                             | 2015-2019 | 650            | 65             | 349            | 35             | 0              | 0              | 999   |
|                             | Total     | 5032           | 59             | 3436           | 40             | 40             | 0              | 8508  |
| Tenth                       | 2000-2004 | 693            | 56             | 553            | 44             | 0              | 0              | 1246  |
|                             | 2005-2009 | 528            | 57             | 390            | 42             | 2              | 0              | 920   |
|                             | 2010-2014 | 296            | 53             | 258            | 46             | 4              | 1              | 558   |
|                             | 2015-2019 | 187            | 67             | 93             | 33             | 0              | 0              | 280   |
|                             | Total     | 1704           | 57             | 1294           | 43             | 6              | 0              | 3004  |
| Fifteenth                   | 2000-2004 | 286            | 52             | 269            | 48             | 0              | 0              | 555   |
|                             | 2005-2009 | 185            | 49             | 195            | 51             | 0              | 0              | 380   |
|                             | 2010-2014 | 113            | 52             | 105            | 48             | 1              | 0              | 219   |
|                             | 2015-2019 | 68             | 62             | 41             | 38             | 0              | 0              | 109   |
|                             | Total     | 652            | 52             | 610            | 48             | 1              | 0              | 1263  |

<sup>a</sup> index hospitalization (first admission); <sup>§</sup> absolute frequency; <sup>\*</sup> percent frequency

**Supplementary Table S7.** Reasons for hospitalization and re-hospitalization in day hospital regimen of patients with rare tumors in Liguria Region during 2000-2019 by readmission order and calendar period.

| Hospitalization             | Period    | Diagnostic     |                | Surgery<br>Day surgery |                | Therapeutic    |                | Rehabilitation |                | Missing data   |                | Total |
|-----------------------------|-----------|----------------|----------------|------------------------|----------------|----------------|----------------|----------------|----------------|----------------|----------------|-------|
|                             |           | N <sup>§</sup> | % <sup>*</sup> | N <sup>§</sup>         | % <sup>*</sup> | N <sup>§</sup> | % <sup>*</sup> | N <sup>§</sup> | % <sup>*</sup> | N <sup>§</sup> | % <sup>*</sup> |       |
| H <sub>0</sub> <sup>a</sup> | 2000-2004 | 3311           | 54             | 1468                   | 24             | 615            | 10             | 13             | 0              | 687            | 11             | 6094  |
|                             | 2005-2009 | 1840           | 35             | 1089                   | 21             | 1631           | 31             | 8              | 0              | 691            | 13             | 5259  |
|                             | 2010-2014 | 664            | 16             | 749                    | 18             | 1598           | 39             | 6              | 0              | 1044           | 26             | 4061  |
|                             | 2015-2019 | 291            | 10             | 1068                   | 39             | 1133           | 41             | 0              | 0              | 281            | 10             | 2773  |
|                             | Total     | 6106           | 34             | 4374                   | 24             | 4977           | 27             | 27             | 0              | 2703           | 15             | 18187 |
| First                       | 2000-2004 | 1771           | 48             | 640                    | 17             | 911            | 25             | 7              | 0              | 358            | 10             | 3687  |
|                             | 2005-2009 | 860            | 29             | 216                    | 7              | 1591           | 53             | 9              | 0              | 321            | 11             | 2997  |
|                             | 2010-2014 | 288            | 13             | 170                    | 7              | 1622           | 70             | 4              | 0              | 219            | 10             | 2303  |
|                             | 2015-2019 | 128            | 7              | 152                    | 8              | 1557           | 84             | 3              | 0              | 23             | 1              | 1863  |
|                             | Total     | 3047           | 28             | 1178                   | 11             | 5681           | 52             | 23             | 0              | 921            | 8              | 10850 |
| Second                      | 2000-2004 | 1308           | 47             | 380                    | 14             | 858            | 31             | 10             | 0              | 228            | 8              | 2784  |
|                             | 2005-2009 | 612            | 27             | 95                     | 4              | 1341           | 59             | 9              | 0              | 202            | 9              | 2259  |
|                             | 2010-2014 | 199            | 12             | 61                     | 4              | 1370           | 79             | 6              | 0              | 93             | 5              | 1729  |
|                             | 2015-2019 | 66             | 6              | 56                     | 5              | 1048           | 89             | 3              | 0              | 4              | 0              | 1177  |
|                             | Total     | 2185           | 27             | 592                    | 7              | 4617           | 58             | 28             | 0              | 527            | 7              | 7949  |
| Third                       | 2000-2004 | 972            | 46             | 230                    | 11             | 726            | 35             | 4              | 0              | 161            | 8              | 2093  |
|                             | 2005-2009 | 501            | 30             | 63                     | 4              | 992            | 59             | 11             | 1              | 111            | 7              | 1678  |
|                             | 2010-2014 | 165            | 13             | 42                     | 3              | 959            | 78             | 3              | 0              | 55             | 4              | 1224  |
|                             | 2015-2019 | 48             | 7              | 30                     | 4              | 650            | 89             | 1              | 0              | 0              | 0              | 729   |
|                             | Total     | 1686           | 29             | 365                    | 6              | 3327           | 58             | 19             | 0              | 327            | 6              | 5724  |
| Fourth                      | 2000-2004 | 719            | 44             | 168                    | 10             | 617            | 38             | 4              | 0              | 124            | 8              | 1632  |
|                             | 2005-2009 | 348            | 28             | 52                     | 4              | 762            | 61             | 7              | 1              | 82             | 7              | 1251  |
|                             | 2010-2014 | 128            | 14             | 18                     | 2              | 745            | 81             | 2              | 0              | 32             | 3              | 925   |
|                             | 2015-2019 | 58             | 11             | 17                     | 3              | 432            | 85             | 0              | 0              | 1              | 0              | 508   |
|                             | Total     | 1253           | 29             | 255                    | 6              | 2556           | 59             | 13             | 0              | 239            | 6              | 4316  |
| Fifth                       | 2000-2004 | 609            | 46             | 95                     | 7              | 517            | 39             | 4              | 0              | 98             | 7              | 1323  |
|                             | 2005-2009 | 328            | 31             | 28                     | 3              | 632            | 60             | 6              | 1              | 63             | 6              | 1057  |
|                             | 2010-2014 | 115            | 16             | 16                     | 2              | 548            | 78             | 2              | 0              | 26             | 4              | 707   |
|                             | 2015-2019 | 45             | 13             | 8                      | 2              | 295            | 85             | 0              | 0              | 1              | 0              | 349   |
|                             | Total     | 1097           | 32             | 147                    | 4              | 1992           | 58             | 12             | 0              | 188            | 5              | 3436  |
| Tenth                       | 2000-2004 | 251            | 45             | 20                     | 4              | 240            | 43             | 0              | 0              | 42             | 8              | 553   |
|                             | 2005-2009 | 133            | 34             | 3                      | 1              | 235            | 60             | 0              | 0              | 19             | 5              | 390   |
|                             | 2010-2014 | 81             | 31             | 6                      | 2              | 163            | 63             | 0              | 0              | 8              | 3              | 258   |
|                             | 2015-2019 | 27             | 29             | 6                      | 6              | 60             | 65             | 0              | 0              | 0              | 0              | 93    |
|                             | Total     | 492            | 38             | 35                     | 3              | 698            | 54             | 0              | 0              | 69             | 5              | 1294  |
| Fifteenth                   | 2000-2004 | 134            | 50             | 4                      | 1              | 114            | 42             | 0              | 0              | 17             | 6              | 269   |
|                             | 2005-2009 | 93             | 48             | 2                      | 1              | 96             | 49             | 0              | 0              | 4              | 2              | 195   |
|                             | 2010-2014 | 44             | 42             | 0                      | 0              | 58             | 55             | 0              | 0              | 3              | 3              | 105   |
|                             | 2015-2019 | 18             | 44             | 1                      | 2              | 22             | 54             | 0              | 0              | 0              | 0              | 41    |
|                             | Total     | 289            | 47             | 7                      | 1              | 290            | 48             | 0              | 0              | 24             | 4              | 610   |

<sup>a</sup> index hospitalization (first admission); <sup>§</sup> absolute frequency; <sup>\*</sup> percent frequency

**Supplementary Table S8.** Joint effect of tumor group, gender, age at H0, period of H0 and vital status at last discharge on re-hospitalization rates of patients with rare tumors in Liguria Region during 2000-2019, estimated through the multivariable negative-binomial regression method.

| Characteristics & categories          | Rate <sup>c</sup> | 95%CI <sup>e</sup> | RR <sup>d</sup> | 95%CI <sup>e</sup>  | P-value <sup>f</sup> |
|---------------------------------------|-------------------|--------------------|-----------------|---------------------|----------------------|
| Tumor Groups                          |                   |                    |                 |                     | <0.001               |
| Sarcomas (SAR)                        | 6.68              | 5.94-7.51          | 1.00            | (Ref.) <sup>g</sup> |                      |
| Central nervous system (CNS)          | 7.40              | 6.61-8.29          | 1.11            | 0.99-1.25           |                      |
| Head and neck (HNT)                   | 5.57              | 4.96-6.26          | 0.83            | 0.74-0.94           |                      |
| Hematological (HET)                   | 6.44              | 5.76-7.21          | 0.97            | 0.86-1.08           |                      |
| Thoracic cavity (TCT)                 | 7.58              | 6.72-8.55          | 1.14            | 1.01-1.28           |                      |
| Genitourinary system (GUT)            | 5.59              | 4.94-6.33          | 0.84            | 0.74-0.95           |                      |
| Female genital system (FGT)           | 4.64              | 4.00-5.39          | 0.70            | 0.59-0.81           |                      |
| Digestive system (DGT)                | 6.80              | 6.07-7.62          | 1.02            | 0.91-1.14           |                      |
| Endocrine glands (EGT)                | 4.90              | 4.34-5.52          | 0.73            | 0.65-0.83           |                      |
| Skin (SKT)                            | 2.17              | 1.90-2.47          | 0.32            | 0.29-0.37           |                      |
| Gender                                |                   |                    |                 |                     | 0.106                |
| Male                                  | 2.27              | 2.00-2.58          | 1.00            | (Ref.) <sup>g</sup> |                      |
| Female                                | 2.17              | 1.90-2.47          | 0.95            | 0.90-1.01           |                      |
| Age at H <sub>0</sub> <sup>a</sup>    |                   |                    |                 |                     | <0.001               |
| 0-56                                  | 2.13              | 1.87-2.43          | 1.00            | (Ref.) <sup>g</sup> |                      |
| 57-69                                 | 1.65              | 1.45-1.88          | 0.77            | 0.72-0.84           |                      |
| 70-78                                 | 1.70              | 1.50-1.93          | 0.80            | 0.74-0.86           |                      |
| 79-103                                | 2.17              | 1.90-2.47          | 1.02            | 0.94-1.10           |                      |
| Period of H <sub>0</sub> <sup>a</sup> |                   |                    |                 |                     | <0.001               |
| 2000-2004                             | 0.92              | 0.81-1.04          | 1.00            | (Ref.) <sup>g</sup> |                      |
| 2005-2009                             | 1.01              | 0.89-1.15          | 1.10            | 1.02-1.19           |                      |
| 2010-2014                             | 1.15              | 1.01-1.30          | 1.25            | 1.16-1.35           |                      |
| 2015-2019                             | 2.17              | 1.90-2.47          | 2.35            | 2.18-2.55           |                      |
| Vital status <sup>b</sup>             |                   |                    |                 |                     | <0.001               |
| Alive                                 | 1.79              | 1.57-2.03          | 1.00            | (Ref.) <sup>g</sup> |                      |
| Died                                  | 2.17              | 1.90-2.47          | 1.21            | 1.15-1.28           |                      |
| Constant <sup>h</sup>                 | 3.10              | 2.85-3.35          | -               | -                   | -                    |

<sup>a</sup> index hospitalization (first admission); <sup>b</sup> vital status at last discharge; <sup>c</sup> re-hospitalization rate per patient/year; <sup>d</sup> rate ratio; <sup>e</sup> 95% confidence interval for Rate/RR; <sup>f</sup> probability level of the likelihood ratio test; <sup>g</sup> reference category; <sup>h</sup> overall mean rate.

Note: rates and 95%CI were estimated through the negative-binomial distribution.
